# Supplementary material for: Troponin in COVID-19: To Measure or Not to Measure? Insights from a Prospective Cohort Study
Source: MDPI journal article supplement (doi:10.3390/jcm11195951), 2022-10-09
Supplement: s1 [file s1]

## Supplementary Material

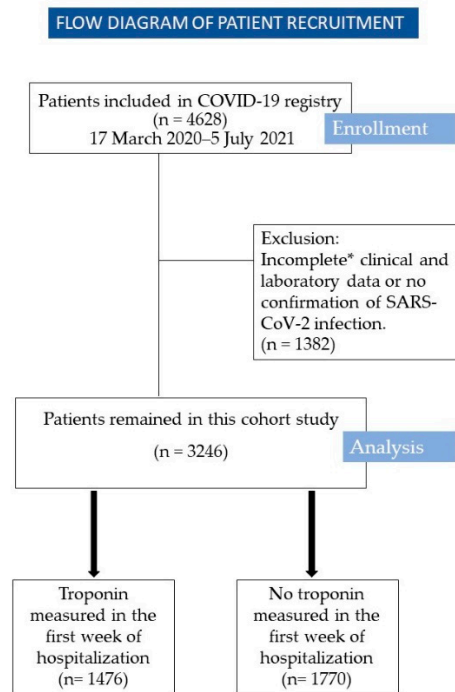

**Figure S1.** Flow diagram of patient recruitment

\*Patients were excluded from the analysis due to impossibility of clinical data collection in some centers during turbulent periods of the pandemic or no confirmation of SARS-CoV2 infection.

**Table S1.** Troponin assays.

| Troponin assay                                           | 99 <sup>th</sup> percentile URL (ng/L)* |      |        |
|----------------------------------------------------------|-----------------------------------------|------|--------|
|                                                          | Overall                                 | Male | Female |
| Vitros Fusion 5.1 Troponin I hs                          | 11                                      | 13   | 9      |
| BioMérieux VIDAS 3 Troponin I hs                         | 19                                      | 25   | 11     |
| ADVIA Centaur Troponin I hs                              | 47                                      | 57   | 37     |
| XT 76000 Troponin I hs                                   | 11                                      | 13   | 9      |
| Vitros 5600 Troponin hs                                  | 11                                      | 13   | 9      |
| Roche cTnT-hs STAT on cobas e 601, 602, E170; commercial | 14                                      | 16   | 9      |
| Abbott / ARCHITECT I systems / hs Troponin-I             | 26.2                                    | 34.2 | 15.6   |

URL, upper reference limit. \*According to manufacturer.

**Table S2.** Baseline characteristics of patients according to serum troponin levels.

| Characteristics                       | All patients<br>(n=3246) | Troponin levels (URL)        |                                |                                |                          |                                 | $\chi^2$ test<br>P-value |
|---------------------------------------|--------------------------|------------------------------|--------------------------------|--------------------------------|--------------------------|---------------------------------|--------------------------|
|                                       |                          | $\leq 1x$<br>(n=1123; 34.6%) | $> 1$ to $3x$<br>(n=127; 3.9%) | $> 3$ to $10x$<br>(n=87; 2.7%) | $> 10x$<br>(n=139; 4.3%) | Not measured<br>(n=1770; 54.5%) |                          |
| <b>Sex, No (%)</b>                    |                          |                              |                                |                                |                          |                                 |                          |
| Male                                  | 1935 (59.6)              | 667 (34.5)                   | 85 (4.4)                       | 59 (3.0)                       | 84 (4.3)                 | 1040 (53.7)                     | 0.210                    |
| Female                                | 1311 (40.4)              | 456 (34.8)                   | 42 (3.2)                       | 28 (2.1)                       | 55 (4.2)                 | 730 (55.7)                      |                          |
| <b>Age, No (%)</b>                    |                          |                              |                                |                                |                          |                                 |                          |
| < 40 years                            | 603 (18.6)               | 235 (39.0)                   | 5 (0.8)                        | 6 (1.0)                        | 8 (1.3)                  | 349 (57.9)                      | < 0.001                  |
| 40 to 59 years                        | 1357 (41.8)              | 524 (38.6)                   | 30 (2.2)                       | 20 (1.5)                       | 35 (2.6)                 | 748 (55.1)                      |                          |
| 60 to 69 years                        | 541 (16.7)               | 174 (32.2)                   | 29 (5.4)                       | 21 (3.9)                       | 36 (6.7)                 | 281 (51.9)                      |                          |
| $\geq 70$ years                       | 745 (23.0)               | 190 (25.5)                   | 63 (8.5)                       | 40 (5.4)                       | 60 (8.1)                 | 392 (52.6)                      |                          |
| <b>O<sub>2</sub> Sat, No (%)</b>      |                          |                              |                                |                                |                          |                                 |                          |
| $\geq 94\%$                           | 2327 (71.7)              | 832 (35.8)                   | 84 (3.6)                       | 45 (1.9)                       | 94 (4.0)                 | 1272 (54.7)                     | < 0.001                  |
| $\leq 93\%$                           | 919 (28.3)               | 291 (31.7)                   | 43 (4.7)                       | 42 (4.6)                       | 45 (4.9)                 | 498 (54.2)                      |                          |
| <b>Diabetes, No (%)</b>               |                          |                              |                                |                                |                          |                                 |                          |
| No                                    | 2434 (75)                | 869 (35.7)                   | 84 (3.5)                       | 55 (2.3)                       | 95 (3.9)                 | 1331 (54.7)                     | 0.001                    |
| Yes                                   | 812 (25)                 | 254 (31.3)                   | 43 (5.3)                       | 32 (3.9)                       | 44 (5.4)                 | 439 (54.1)                      |                          |
| <b>Hipertension, No (%)</b>           |                          |                              |                                |                                |                          |                                 |                          |
| No                                    | 1403 (43.2)              | 526 (37.5)                   | 27 (1.9)                       | 20 (1.4)                       | 41 (2.9)                 | 789 (56.2)                      | < 0.001                  |
| Yes                                   | 1843 (56.8)              | 597 (32.4)                   | 100 (5.4)                      | 67 (3.6)                       | 98 (5.3)                 | 981 (53.2)                      |                          |
| <b>Heart Failure, No (%)</b>          |                          |                              |                                |                                |                          |                                 |                          |
| No                                    | 3145 (96.9)              | 1103 (35.1)                  | 113 (3.6)                      | 81 (2.6)                       | 131 (4.2)                | 1717 (54.6)                     | < 0.001                  |
| Yes                                   | 101 (3.1)                | 20 (19.8)                    | 14 (13.9)                      | 6 (5.9)                        | 8 (7.9)                  | 53 (52.5)                       |                          |
| <b>Coronary disease, No (%)</b>       |                          |                              |                                |                                |                          |                                 |                          |
| No                                    | 3029 (93.3)              | 1060 (35.0)                  | 103 (3.4)                      | 76 (2.5)                       | 124 (4.1)                | 1666 (55.0)                     | < 0.001                  |
| Yes                                   | 217 (6.7)                | 63 (29.0)                    | 24 (11.1)                      | 11 (5.1)                       | 15 (6.9)                 | 104 (47.9)                      |                          |
| <b>Chronic heart disease, No (%)</b>  |                          |                              |                                |                                |                          |                                 |                          |
| No                                    | 3079 (94.9)              | 1075 (34.9)                  | 111 (3.6)                      | 76 (2.5)                       | 122 (4.0)                | 1695 (55.1)                     | < 0.001                  |
| Yes                                   | 167 (5.1)                | 48 (28.7)                    | 16 (9.6)                       | 11 (6.6)                       | 17 (10.2)                | 75 (44.9)                       |                          |
| <b>Chronic kidney disease, No (%)</b> |                          |                              |                                |                                |                          |                                 |                          |
| No                                    | 3094 (95.3)              | 1094 (35.4)                  | 118 (3.8)                      | 77 (2.5)                       | 129 (4.2)                | 1676 (54.2)                     | < 0.001                  |
| Yes                                   | 152 (4.7)                | 29 (19.1)                    | 9 (5.9)                        | 10 (6.6)                       | 10 (6.6)                 | 94 (61.8)                       |                          |

URL, upper reference limit, O<sub>2</sub> sat, oxygen saturation.

**Table S3.** In-hospital mortality according to troponin level in the first week.

| Troponin              | All patients<br>n (%) | In-hospital mortality |              |             | $\chi^2$ test<br>p-Value |
|-----------------------|-----------------------|-----------------------|--------------|-------------|--------------------------|
|                       |                       | No<br>n (%)           | Yes<br>n (%) | CI95%       |                          |
| ≤ 1 x URL (no injury) | 1123 (100)            | 1061 (94.5)           | 62 (5.5)     | 4.3 - 7.0   | < 0.001                  |
| >1x URL (injury)      | 353 (100)             | 273 (77.3)            | 80 (22.7)    | 18.5– 27.3  |                          |
| > 1 to 3x URL         | 127 (100)             | 110 (86.6)            | 17 (13.4)    | 8.3 - 20.2  |                          |
| > 3 to 10x URL        | 87 (100)              | 67 (77.0)             | 20 (23.0)    | 15.1 - 32.7 | < 0.001                  |
| > 10x URL             | 139 (100)             | 96 (69.1)             | 43 (30.9)    | 23.7 - 39.0 |                          |
| Measured              | 1476 (100)            | 1334 (90.4)           | 142 (9.6)    | 8.2–11.2    |                          |
| Not measured          | 1770 (100)            | 1559 (88.1)           | 211 (11.9)   | 10.5 - 13.5 | 0.04                     |
| All patients          | 3246 (100)            | 2893 (89.1)           | 353 (10.9)   | 9.8 - 12.0  |                          |

CI, confidence interval; URL, upper reference limit.

**Table S4.** In-hospital mortality by complications (*n* = 3246).

| Complications            | In-hospital mortality | RR   | c <sup>2</sup> test P-value |
|--------------------------|-----------------------|------|-----------------------------|
| Thromboembolic phenomena |                       |      |                             |
| No                       | 10.3%                 | 1    | < 0,001                     |
| Yes                      | 25.8%                 | 2.5  |                             |
| Stroke or TIA            |                       |      |                             |
| No                       | 10.7%                 | 1    | 0.017                       |
| Yes                      | 18.5%                 | 1.7  |                             |
| Myopericarditis          |                       |      |                             |
| No                       | 10.7%                 | 1    | 0.003                       |
| Yes                      | 24.4%                 | 2.3  |                             |
| Myocardial ischemia*     |                       |      |                             |
| No                       | 10.4%                 | 1    | < 0,001                     |
| Yes                      | 33.3%                 | 3.2  |                             |
| Acute renal failure      |                       |      |                             |
| No                       | 4.7%                  | 1    | < 0,001                     |
| Yes                      | 57.6%                 | 12.3 |                             |
| Sepsis or septic shock   |                       |      |                             |
| No                       | 5.8%                  | 1    | < 0,001                     |
| Yes                      | 54.0%                 | 9.3  |                             |
| Invasive ventilation     |                       |      |                             |
| No                       | 1.4%                  | 1    | < 0,001                     |
| Yes                      | 51.0%                 | 36.4 |                             |

\*Acute myocardial infarction, myocardial ischemia, or coronary intervention.

RR, relative risk; TIA, transient ischemic attack.

**Table S5.** Complications according to troponin measurement ( $n = 3246$ ).

| Complications                | Total (n=3246)<br>n (%) | Incidence<br>Troponin |                          | c <sup>2</sup> test<br>p-value |
|------------------------------|-------------------------|-----------------------|--------------------------|--------------------------------|
|                              |                         | Measured<br>n (%)     | Not<br>measured<br>n (%) |                                |
| Thromboembolic phenomena     | 120 (3.7)               | 43 (2.9)              | 77 (4.4)                 | 0.31                           |
| Stroke or TIA                | 92 (2.8)                | 45 (3.0)              | 47 (2.7)                 | 0.501                          |
| Myopericarditis              | 45 (1.4)                | 30 (2.0)              | 15 (0.8)                 | 0.004                          |
| Heart failure                | 82 (2.5)                | 39 (2.6)              | 44 (2.5)                 | 0.873                          |
| Myocardial ischemia          | 72 (2.2)                | 48 (3.3)              | 24 (1.4)                 | < 0.001                        |
| Sepsis or septic shock       | 339 (10.4)              | 175 (11.8)            | 165 (9.3)                | 0.022                          |
| Acute renal failure          | 380 (11.7)              | 160 (10.8)            | 220 (12.4)               | 0.161                          |
| Invasive ventilatory support | 621 (19.1)              | 250 (16.9)            | 371 (21.0)               | 0.004                          |

TIA, transient ischemic attack.
